1 **Metformin on Time to Sustained Recovery in Adults with COVID-19: The ACTIV-6 Randomized**  
2 **Clinical Trial**

3  
4 Carolyn T. Bramante, MD, MPH,<sup>1</sup> Thomas G. Stewart, PhD,<sup>2</sup> David R. Boulware, MD, MPH,<sup>1</sup> Matthew  
5 W. McCarthy, MD,<sup>3</sup> Yue Gao, MS, Med,<sup>4</sup> Russell L. Rothman, MD, MPP,<sup>4</sup> Ahmad Mourad, MD,<sup>5,6</sup>  
6 Florence Thicklin,<sup>7</sup> Jonathan B. Cohen, MD,<sup>8</sup> Idania T. Garcia del Sol, MD,<sup>9</sup> Juan Ruiz-Unger, MD,<sup>10</sup>  
7 Nirav S. Shah, MD, MPH,<sup>11</sup> Manisha Mehta, DPM,<sup>12</sup> Orlando Quintero Cardona, MD,<sup>13</sup> Jake Scott, MD,<sup>13</sup>  
8 Adit A. Ginde, MD, MPH,<sup>14</sup> Mario Castro, MD, MPH,<sup>15</sup> Dushyantha Jayaweera, MD,<sup>16</sup> Mark Sulkowski,  
9 MD,<sup>17</sup> Nina Gentile, MD,<sup>18</sup> Kathleen McTigue, MD,<sup>19</sup> G. Michael Felker, MD,<sup>5,6</sup> Sean Collins, MD,  
10 MSci,<sup>4,20</sup> Sarah E. Dunsmore, PhD,<sup>21</sup> Stacey J. Adam, PhD,<sup>22</sup> Christopher J. Lindsell, PhD,<sup>6</sup> Adrian F.  
11 Hernandez, MD, MHS,<sup>6</sup> Susanna Naggie, MD, MHS<sup>6</sup> for the Accelerating COVID-19 Therapeutic  
12 Interventions and Vaccines (ACTIV)-6 Study Group and Investigators  
13

14 <sup>1</sup>Department of Medicine, University of Minnesota Medical School, Minneapolis, MN; <sup>2</sup>School of Data  
15 Science, University of Virginia, Charlottesville, VA; <sup>3</sup>Weill Cornell Medicine, New York, NY; <sup>4</sup>Vanderbilt  
16 University Medical Center, Nashville, TN; <sup>5</sup>Department of Medicine, Duke University School of  
17 Medicine, Durham, NC; <sup>6</sup>Duke Clinical Research Institute, Duke University School of Medicine,  
18 Durham, NC; <sup>7</sup>Stakeholder Advisory Committee, Pittsburgh, PA; <sup>8</sup>Jadestone Clinical Research, LLC,  
19 Silver Spring, MD; <sup>9</sup>L&A Morales Healthcare, Inc., Miami, FL; <sup>10</sup>Innovation Clinical Trials, Inc., Miami,  
20 FL; <sup>11</sup>Endeavor Health, Evanston, IL; <sup>12</sup>GCF of Southeastern Michigan, PC, Detroit, MI; <sup>13</sup>Stanford  
21 University School of Medicine, Department of Medicine, Division of Infectious Diseases, Stanford, CA;  
22 <sup>14</sup>University of Colorado School of Medicine, Aurora, CO; <sup>15</sup>Division of Pulmonary, Critical Care and  
23 Sleep Medicine, University of Kansas Medical Center, Kansas City, KS; <sup>16</sup>Department of Medicine,  
24 Miller School of Medicine, University of Miami, Miami, FL; <sup>17</sup>Division of Infectious Diseases, Johns  
25 Hopkins University, Baltimore, MD; <sup>18</sup>Department of Emergency Medicine, Lewis Katz School of  
26 Medicine at Temple University, Philadelphia, PA; <sup>19</sup>Department of Medicine, University of Pittsburgh

27 Medical Center, Pittsburgh, PA; <sup>20</sup>Veterans Affairs Tennessee Valley Healthcare System, Geriatric  
28 Research, Education and Clinical Center (GRECC), Nashville, TN; <sup>21</sup>National Center for Advancing  
29 Translational Sciences, Bethesda, MD; <sup>22</sup>Foundation for the National Institutes of Health, Bethesda, MD.

30 **Title Character count:** 102

31 **Word count:** 2963

32

33 **Address for correspondence:** Susanna Naggie, MD, MHS, Duke Clinical Research Institute, Duke  
34 University School of Medicine, 300 West Morgan St, Suite 800, Durham, NC 27701. Email:

35 [susanna.naggie@duke.edu](mailto:susanna.naggie@duke.edu)

36

37

38

39

40

41

42

43

44

45

46

47

48

49

50 **Abstract**

51 **Importance:** The effect of metformin on reducing symptom duration among outpatient adults with  
52 coronavirus disease 2019 (COVID-19) has not been studied.

53 **Objective:** Assess metformin compared with placebo for symptom resolution during acute infection with  
54 SARS-CoV-2.

55 **Design, Setting, and Participants:** The ACTIV-6 platform evaluated repurposed medications for mild to  
56 moderate COVID-19. Between September 19, 2023, and May 1, 2024, 2991 participants age  $\geq 30$  years  
57 with confirmed SARS-CoV-2 infection and  $\geq 2$  COVID-19 symptoms for  $\leq 7$  days, were included at 90 US  
58 sites.

59 **Interventions:** Participants were randomized to receive metformin (titrated to 1500 mg daily) or placebo  
60 for 14 days.

61 **Main Outcomes and Measures:** The primary outcome was time to sustained recovery (3 consecutive  
62 days without COVID-19 symptoms) within 28 days of receiving study drug. Secondary outcomes  
63 included time to hospitalization or death; time to healthcare utilization (clinic visit, emergency department  
64 visit, hospitalization, or death). Safety events of special interest were hypoglycemia and lactic acidosis.

65 **Results:** Among 2991 participants who were randomized and received study drug, the median age was 47  
66 years (IQR 38–58); 63.4% were female, 46.5% identified as Hispanic/Latino, and 68.3% reported  $\geq 2$   
67 doses of a SARS-CoV-2 vaccine. Among 1443 participants who received metformin and 1548 who  
68 received placebo, differences in time to sustained recovery were not observed (adjusted hazard ratio  
69 [aHR] 0.96; 95% credible interval [CrI] 0.89–1.03; P(efficacy)=0.11). For participants enrolled during  
70 current variants, the aHR was 1.19 (95% CrI 1.05–1.34). The median time to sustained recovery was 9  
71 days (95% confidence interval [CI] 9–10) for metformin and 10 days (95% CI 9–10) for placebo. No  
72 deaths were reported; 111 participants reported healthcare utilization: 58 in the metformin group and 53 in  
73 the placebo group (HR 1.24; 95% CrI 0.81–1.75; P(efficacy)=0.135). Seven participants who received  
74 metformin and 3 who received placebo experienced a serious adverse event over 180 days. Five  
75 participants in each group reported having hypoglycemia.

76 **Conclusions and Relevance** In this randomized controlled trial, metformin was not shown to shorten the  
77 time to symptom resolution in adults with mild to moderate COVID-19. The median days to symptom  
78 resolution was numerically but not significantly lower for metformin. Safety was not a limitation in the  
79 study population.

80

81 **Trial Registration:** ClinicalTrials.gov (NCT04885530).

82

## 83 INTRODUCTION

84 Metformin has been the first-line medication for type 2 diabetes for decades. Metformin has also been  
85 shown to exhibit *in vitro* antiviral actions in studies with dengue, hepatitis C, and rotavirus, potentially via  
86 host-directed modulation of the mammalian target of rapamycin (mTOR) pathway.<sup>1-9</sup> Observational and  
87 prospective analyses have reported that prevalent metformin use was associated with less severe  
88 outcomes during acute infection with severe acute respiratory syndrome coronavirus 2 (SARS-CoV-2).<sup>10-</sup>  
89 <sup>18</sup> In the COVID-OUT randomized trial of metformin versus placebo, the outcome of hospitalization /  
90 death occurred in 1.3% of the metformin group and 3.2% of the placebo group, suggesting that further  
91 study was warranted to validate these findings.<sup>13</sup>

92 As effective vaccines, natural immunity, and antivirals now make hospitalizations and deaths  
93 from coronavirus disease 2019 (COVID-19) rare, outpatient treatment for symptom resolution remains a  
94 need. The Accelerating Coronavirus Disease 2019 Therapeutic Interventions and Vaccines (ACTIV-6)  
95 platform randomized clinical trial evaluated repurposed medications in the outpatient setting.<sup>19</sup> For this  
96 study, the ACTIV-6 platform sought to evaluate the effect of 14 days of immediate-release metformin,  
97 titrated to 1500 mg over 6 days, on time to sustained recovery from mild to moderate COVID-19 in non-  
98 hospitalized adults.

99

## 100 METHODS

### 101 Trial Design and Oversight

102 ACTIV-6 was a double-blind randomized placebo-controlled platform trial of repurposed medications in  
103 outpatient adults with mild to moderate COVID-19.<sup>19,20</sup> ACTIV-6 was decentralized, allowing virtual  
104 enrollment and enrollment through health care and community settings, to improve access. The trial  
105 protocol was approved by a central institutional review board with review at each site. Informed consent  
106 was obtained from each participant. An independent data and safety monitoring committee oversaw  
107 participant safety, efficacy, and trial conduct. Reporting followed CONSORT guidelines for randomized  
108 trials.<sup>21</sup>

109 **Participants**

110 The ACTIV-6 platform was open to enrollment from June 11, 2021, to April 29, 2024, with ~11,000  
111 participants randomized across 7 interventions. The metformin group enrolled participants from 90 U.S.  
112 sites between September 19, 2023 and May 1, 2024 (**Supplement**).

113 Eligibility criteria were confirmed at the site level and included age  $\geq 30$  years, confirmed SARS-  
114 CoV-2 infection (positive polymerase chain reaction or home-based antigen test) within 10 days, and  
115 actively experiencing  $\geq 2$  COVID-19 symptoms for  $\leq 7$  days at the time of consent. Individuals meeting  
116 the following criteria were excluded: current hospitalization for COVID-19; current or recent use (within  
117 14 days) of metformin, insulin, or sulfonylureas; and known allergy or contraindications to metformin.  
118 Prior infection, receipt of COVID-19 vaccinations, or current use of approved or emergency use  
119 authorization therapeutics for COVID-19 were allowed.

120

121 **Randomization**

122 Enrollment for metformin did not overlap with other agents on the platform. A random number generator  
123 randomized participants 1:1 to metformin or placebo.

124

125 **Interventions**

126 Metformin (immediate-release tablets manufactured by Aurobindo Pharma USA Inc., East Windsor, NJ,  
127 USA) or placebo was dispensed to participants via home delivery from a centralized pharmacy. Matching  
128 placebo was available after November 9, 2023; 134 participants in the placebo group were enrolled when  
129 generic placebo was used. Participants were instructed to self-administer oral metformin (or placebo) at a  
130 dose of 500 mg per day (one 500 mg tablet) for 1 day, followed by 500 mg twice a day for 4 days,  
131 followed by 500 mg in the morning and 1000 mg in the evening for 9 days, for a 14-day course of 36 total  
132 tablets.

133

134

135 **Outcome Measures**

136 The primary outcome was time to sustained recovery within 28 days, defined as the time from receipt of  
137 drug to the third of 3 consecutive days without any COVID-19 symptoms.<sup>7,9</sup> This measure was selected *a*  
138 *priori* from the 2 possible primary outcomes of the platform, per the statistical analysis plan. The other—  
139 time to hospitalization or death—transitioned to a secondary outcome because there were not sufficient  
140 clinical outcomes in the trial overall to study those events as the primary outcome.

141 Pre-specified secondary outcomes included 3 time-to-event endpoints administratively censored  
142 at day 28 (number of events permitting): time to death; time to hospitalization or death; and time to first  
143 healthcare utilization (a composite of clinic visit, emergency department visit, hospitalization, or death).  
144 Additional outcomes included mean time spent unwell through day 14 and the WHO COVID Clinical  
145 Progression Scale on days 7, 14, and 28 (**Supplement**). Long COVID symptoms and patient-reported  
146 outcomes are being collected through day 180 and are not included in this report.

147

148 **Trial Procedures**

149 Screening and eligibility information were self-reported by participants; infection status was confirmed by  
150 sites. Demographic information, medical history, use of concomitant medications, and COVID-19  
151 symptoms were self-reported. The centralized investigational pharmacy packaged and shipped active or  
152 placebo study products to participants. Day 1 was defined based on receipt of study product as tracked by  
153 the courier. Daily assessments were sent to participants via the online REDcap electronic data capture  
154 portal during the first 14 days, regardless of symptom status.<sup>22,23</sup> If participants still had symptoms on day  
155 14, the daily assessments continued until sustained recovery or day 28. Planned remote follow-up visits  
156 occurred on days 28, 90, 120, 150, and 180.

157 Two safety events of interest were added for the metformin protocol: lactic acidosis or patient-  
158 reported hypoglycemia. Participants were not instructed to monitor blood sugar and the study did not send  
159 glucometers.

160

161 **Statistical Analysis Plan**

162 Inferences about the primary outcome and exploratory analyses involving secondary outcomes were  
163 based primarily on covariate-adjusted regression modeling, supplemented by unadjusted models.  
164 Proportional hazard regression was used for time-to-event analysis, and cumulative probability ordinal  
165 regression models were used for ordinal outcomes. Differences in the mean time spent unwell were  
166 estimated with longitudinal ordinal regressions models.<sup>24</sup>

167 The primary endpoint analysis was a Bayesian proportional hazards model. The primary  
168 inferential quantity was the posterior distribution for the treatment assignment hazard ratio (HR), with a  
169  $HR > 1$  indicating benefit. If the posterior probability of benefit exceeded 0.95 during interim or final  
170 analyses, the efficacy threshold would be met. To preserve type I error  $< 0.05$ , the prior for the treatment  
171 effect parameter on the log relative hazard scale was a normal distribution centered at 0 and scaled to a  
172 standard deviation (SD) of 0.1. All other parameter priors were weakly informative, using the software  
173 default of 2.5 times the ratio of the SD of the outcome divided by the SD of the predictor variable. The  
174 study was designed to have 80% power to detect a HR of 1.2 in the primary endpoint.

175 The model for the primary endpoint included predictor variables: randomization assignment, age,  
176 sex, duration of symptoms prior to study drug receipt, calendar time, vaccination status, geographical  
177 location, call center indicator, and day 1 symptom severity. The proportional hazard assumption of the  
178 primary endpoint was evaluated by generating visual diagnostics such as the log-log plot and plots of  
179 time-dependent regression coefficients for each predictor in the model.

180 Secondary endpoints were analyzed with Bayesian regression models (either proportional hazards  
181 or proportional odds). Weakly informative priors were used for all parameters. Analyses resulting from  
182 secondary endpoints should be interpreted as exploratory given the potential for type I errors due to  
183 multiple comparisons.

184 All available data were used to compare metformin versus placebo, regardless of post-  
185 randomization adherence. The modified intention-to-treat (mITT) cohort comprised all participants who  
186 were randomized, who did not withdraw before study drug delivery, were not administratively withdrawn,



187 and for whom the courier confirmed study drug delivery. Participants who opted to discontinue data  
188 collection were censored at the time of last contact, including those participants who did not complete any  
189 surveys or phone calls after study drug delivery. Missing data among covariates for both primary and  
190 secondary analyses were addressed with conditional mean imputations.

191 A predefined assessment of treatment effect heterogeneity (HTE) encompassed age, symptom  
192 duration, body mass index (BMI), symptom severity on day 1, calendar time (indicative of circulating  
193 SARS-CoV-2 variant), sex, and vaccination status. A proportion of participants filled out day 1 symptom  
194 surveys after taking the first dose of metformin or placebo, so a sensitivity analysis was done to remove  
195 adjusting for post-intervention symptoms or side effects.<sup>25,26</sup> Metformin can cause a statistically  
196 significant, but not necessarily clinically significant, increase in diarrhea, a known side effect and also a  
197 COVID-19 symptom, soon after intake.<sup>13</sup>

198 Analyses were performed with R<sup>10</sup> version 4.4 with the following primary packages: rstanarm,<sup>11,12</sup>  
199 rmsb,<sup>13</sup> and survival.<sup>14</sup>

200

## 201 **RESULTS**

### 202 **Study Population**

203 Of the 3214 participants randomized, 223 (6.9%) were excluded because study drug was not delivered  
204 within 7 days, or they were administratively withdrawn for not providing accurate confirmation of  
205 infection. Thus, the mITT analysis included 2991 participants, of whom 1443 (48.2%) received  
206 metformin and 1548 (51.8%) received placebo (**Figure 1**). Among the mITT participants, 5.9% confirmed  
207 receiving but taking no study medication and were not included in the safety analysis.

208 The median age of the mITT population was 47 years (interquartile range [IQR] 38–58); 63.4%  
209 were female, 80.1% were White, 11.7% were Black, 0.3% were American Indian or Alaska Native, and  
210 46.5% identified as Hispanic/Latino. Overall, 2% had diabetes, 3% had heart disease, 68.3% reported  $\geq 2$   
211 doses of a SARS-CoV-2 vaccine, and 38.3% had obesity. Comorbidities were well balanced, though  
212 40.1% in the metformin group and 36.6% in the placebo group had obesity (**Table 1**).

213 Study drug was delivered within a median of 5 days of symptom onset (IQR 4–7 days). The  
214 distribution of time between COVID-19 symptoms and study drug delivery is reported in **eFigure 1**.  
215 Participants who achieved 3 days without symptoms on or before study drug delivery were not excluded.  
216 Of the 2710 participants who submitted symptom surveys on the day of study drug delivery, 5% reported  
217 no symptoms, 47% reported mild symptoms, 45% reported moderate symptoms, and 3% reported severe  
218 symptoms (**Table 1, eTable 1**).

219

### 220 **Primary Outcome**

221 Overall, 87/2991(3%) did not provide any follow-up responses beyond study day 1 and an additional  
222 152/2991 (5%) were censored due to partial follow-up responses. Differences in time to sustained  
223 recovery were not observed in either the covariate-adjusted regression models (**Table 2**) or unadjusted  
224 Kaplan-Meier curves (**Figure 2**). The median time to sustained recovery was 9 days (95% CI 9–10) in the  
225 metformin group and 10 days (95% CI 9–10) in the placebo group. The posterior probability for benefit  
226 was 0.11, with an adjusted hazard ratio (aHR) of 0.95 (95% credible interval [CrI] 0.89–1.03). In the  
227 sensitivity analysis that adjusted for symptoms at randomization to remove adjusting for post-intervention  
228 symptoms or side effects, the aHR was 0.98 (95% CrI 0.91–1.05). Sensitivity analyses based on different  
229 patterns of missing symptom data yielded similar estimates of the treatment effect (**eFigure 2**).

230

### 231 **Secondary Outcomes**

232 No deaths were observed in this study. A total of 7/2991 participants (0.23%) were hospitalized (**Table 2,**  
233 **eFigure 3**). There were 58 (4.0%) participants in the metformin group and 53 (3.4%) in the placebo group  
234 who reported a hospital admission, emergency department visit, or clinic visit (**Table 2, eFigure 3**), aHR  
235 for the composite healthcare encounter outcome was 1.24 (95% CrI 0.81–1.75) with a posterior  
236 probability of efficacy of 0.135.

237 By day 7, 163/2991 (5.45%) reported limitation on activities. Because 94% of responding  
238 participants reported no limitations in activity on the COVID clinical progression scale, this endpoint did

239 not meet prespecified thresholds for beneficial treatment effect (**eFigure 4**). Likewise, the mean time  
240 unwell was similar between the metformin and placebo groups, 11.6 days (CrI 11.4–11.7) versus 11.5  
241 days (CrI 11.4–11.7), respectively, (difference 0.03, 95% CrI -0.21 to 0.28; P[efficacy]=0.40) (**Table 2**,  
242 **Figure 3**).

243

#### 244 **Adverse Events and Events of Special Interest**

245 The safety sample for collecting serious adverse events was the 2815/2991 (94.1%) of participants who  
246 reported taking study medication at least once. The incidence of serious events over 180 days was low (11  
247 total events within 10/2825 [0.35%] of participants), with 8 events (7 participants) in the metformin group  
248 and 3 events (3 participants) in the placebo group. There were no episodes of lactic acidosis and 5  
249 episodes of patient-reported hypoglycemia in each treatment group (**eTable 2**).

250

#### 251 **Heterogeneity of Treatment Effect Analyses**

252 In participants with no symptoms on day 1, the aHR for time to symptom recovery was 0.40 (95% CI  
253 0.28–0.58; P<0.01). The interaction model created a calendar time category for those enrolled after March  
254 15, 2024, which is when the FLiRT variants became dominant. In the 349 (12%) participants enrolled  
255 after March 15, 2024, the aHR for time to recovery was 1.19 (95% CI 1.05–1.34; P=0.82) (**eFigure 5**).

256 The primary analysis was stratified by day 1 symptom severity and timing of drug delivery  
257 relative to symptom onset. In those with no symptoms on day 1, the curves separated in the direction of  
258 benefit for placebo; in those with moderate and severe symptoms, the curves separated in the direction of  
259 benefit for metformin (**eFigures 6, 7**).

260 Other baseline characteristics of interest, including history of previous infection and body mass  
261 index (BMI), were assessed in post-hoc exploratory analyses. Overall, 71 participants did not provide  
262 follow-up information, so 44/2920 (1.5%) had an acute healthcare encounter by day 28: 1.4% in the  
263 metformin group and 1.6% in the placebo group. In those with no reported prior infection, 0.99%  
264 experienced an acute healthcare encounter in the metformin group and 1.32% in the placebo group

265 (eTable 3). There was no indication that participants with a BMI <25 kg/m<sup>2</sup> had a longer time to recovery  
266 or more healthcare events (eTable 3).

267

## 268 **DISCUSSION**

269 Among outpatient adults with mild to moderate COVID-19, treatment with immediate-release metformin  
270 did not improve time to sustained recovery compared with placebo. Other studies that investigated  
271 metformin as an outpatient treatment for SARS-CoV-2 infection evaluated severe clinical events and had  
272 limitations: the TOGETHER trial (n=421) had exposure misclassification, but a partially corrected  
273 analysis showed similar results for preventing emergency department visits and hospitalizations as  
274 COVID-OUT<sup>27-29</sup> and the COVID-OUT trial (n=1323) had outcome misclassification, with the primary  
275 outcome driven by the sensitive but non-specific component of the composite (1 oxygen reading <94% on  
276 a home oximeter).<sup>13</sup> Of those randomized trials, COVID-OUT is the most generalizable to the current  
277 state of the pandemic because it enrolled vaccinated individuals and was enrolling after the Omicron  
278 wave started. The ACTIV-6 study of metformin has further relevance as it is the first trial to allow  
279 individuals with a reported history of prior infection to enroll.

280 The incidence of severe outcomes was less than one-quarter of a percent in the ACTIV-6  
281 metformin arm. Such a low incidence means a trial would need to enroll tens of thousands of participants  
282 to test whether treatment prevents hospitalizations and deaths, which is why a symptom recovery outcome  
283 may be more relevant at this point in the pandemic. However, antivirals developed for SARS-CoV-2 have  
284 not reduced symptoms during acute infection.<sup>30,31</sup> Additionally, most participants were enrolled between  
285 December 2023 and March 2024, when the JN-1 variant dominated.<sup>32</sup> JN-1 had higher infectivity but  
286 lower symptom and disease burden than previous variants.<sup>33,34</sup> Most participants achieved symptom  
287 recovery by day 28, and outcomes with high incidence can make it challenging to detect intervention  
288 differences.<sup>13,35</sup> A portion of the trial was enrolled after the FLiRT variants began, and these variants  
289 include mutations similar to those in earlier Omicron subvariants.<sup>36,37</sup>

290 Strengths of this study include high ethnic diversity with 47% of participants identifying as  
291 Hispanic/Latino ethnicity, a result of concerted efforts to translate documents and onboard sites already  
292 engaged with diverse communities. Metformin has been studied in hundreds of clinical trials in patients  
293 with some degree of chronic disease or risk for disease, such as diabetes, diabetes risk factors, and cancer.  
294 This is the first phase 3 trial to randomize adults without chronic disease or disease risk to metformin, and  
295 there were no episodes of low blood sugar or lactic acidosis, despite a rapid dose escalation to 1500 mg in  
296 just 6 days.

297

### 298 **Limitations**

299 This study does have limitations. Due to the decentralized nature of ACTIV-6, time from symptom onset  
300 to receipt of study drug is approximately 2 days longer than time from symptom onset to enrollment.  
301 Trials of antivirals assessing outpatient treatment of SARS-CoV-2, such as nirmatrelvir, simnotrelvir,  
302 ensitrelvir, and molnupiravir, restricted eligibility or the primary analysis to participants enrolled within 3  
303 days of COVID-19 symptom onset.<sup>30,31,38</sup> ACTIV-6 inclusion criteria allowed enrollment of participants  
304 with up to 7 days of symptoms, in part due to various mechanisms of action of the drugs tested on the  
305 platform. However, this resulted in a relatively small number of participants in this study (<21%)  
306 receiving drug within 3 days of symptom onset. Because emerging data from *in vivo* and *in vitro* studies  
307 have shown that metformin has antiviral activity against SARS-Co-V-2, a time-dependent treatment effect  
308 is expected.<sup>14,39-43</sup> An additional limitation for a primary outcome of symptom resolution is that 5% of the  
309 mITT participants had no symptoms on the day of study drug delivery. Prespecified and exploratory  
310 results are directionally consistent with hypotheses about benefit with earlier initiation, consistent with  
311 other studies assessing earlier initiation of metformin, but underpowered subgroups cannot be over-  
312 interpreted.<sup>13,44,45</sup> This study also had a higher proportion of post-randomization exclusions compared  
313 with earlier studies, and the placebo group is 7% larger than the metformin group. Information on effect  
314 modifiers such as time of study drug initiation and previous infection could not always be captured, and  
315 nonresponse for primary and secondary outcome measures is less than 10% but may introduce some bias.

316 **Conclusions**

317 Among low-risk outpatient adults with mild to moderate COVID-19, metformin did not shorten the time  
318 to symptom recovery compared with placebo. The median days to symptom resolution was numerically  
319 but not significantly lower for metformin than placebo. Emergency room visits or hospitalizations were  
320 too infrequent to draw conclusions between the two study groups. There were no episodes of lactic  
321 acidosis or other significant safety concerns in this trial of metformin in adults without diabetes or  
322 diabetes risk factors such as overweight and obesity.

323

324

325

326

327

328

329

330

331 **Acknowledgments**

332 We thank George J. Hanna, MD, of the Biomedical Advanced Research and Development Authority, for  
333 his roles in trial implementation and operations. We also thank the ACTIV-6 Data Monitoring Committee,  
334 Clinical Events Committee, and Stakeholder Advisory Committee Members (listed below) for their  
335 contributions.

336 Data Monitoring Committee: Clyde Yancy, MD, MSc, Northwestern University Feinberg School of  
337 Medicine; Adaora Adimora, MD, University of North Carolina, Chapel Hill; Susan Ellenberg, PhD,  
338 University of Pennsylvania; Kaleab Abebe, PhD, University of Pittsburgh; Arthur Kim, MD,  
339 Massachusetts General Hospital; John D. Lantos, MD, Children's Mercy Hospital; Jennifer Silvey-Cason,  
340 Participant representative; Frank Rockhold, PhD, Duke Clinical Research Institute; Sean O'Brien, PhD,  
341 Duke Clinical Research Institute; Frank Harrell, PhD, Vanderbilt University Medical Center; Zhen  
342 Huang, MS, Duke Clinical Research Institute.

343 Clinical Events Committee: Renato Lopes, MD, PhD, MHS, W. Schuyler Jones, MD, Antonio Gutierrez,  
344 MD, Robert Harrison, MD, David Kong, MD, Robert McGarrah, MD, Michelle Kelsey, MD, Konstantin  
345 Krychtiuk, MD, Vishal Rao, MD all of the Duke Clinical Research Institute, Duke University School of  
346 Medicine.

347 Stakeholder Advisory Committee: Megan E. Hamm, Kathleen McTigue, Kirk T. Phillips, Andrew Vasey,  
348 Talethia Edwards, Danielle Nelson, Greg Merritt, Jeannie Nguyen, Josh Denson, Jonathan Arnold,  
349 Matthew W. McCarthy, Florence Thicklin.

350

351 Elizabeth E.S. Cook of the Duke Clinical Research Institute provided editorial support.

352

353 **Author Contributions**

354 Drs Naggie, Hernandez, and Lindsell had full access to all the blinded data in the study. Dr Stewart was  
355 provided curated study data and takes responsibility for the integrity of the data analysis. All authors  
356 contributed to the drafting and review of the manuscript and agreed to submit for publication.

357 **Disclosures**

358 **Bramante:** Reports grants from NIH NIDDK during the conduct of the study; Grants from NIH outside  
359 the submitted work.

360 **Stewart:** Reports grants from NIH NCATS during the conduct of the study; Grants from NIH outside the  
361 submitted work.

362 **Boulware:** Reports grants from NIH during the conduct of the study.

363 **McCarthy:** Nothing to report.

364 **Gao:** Nothing to report.

365 **Rothman:** Reports grants from NIH, PCORI, AHRQ, CDC, CardioHealth Alliance during the conduct of  
366 the study. Spouse owns stock in Moderna unrelated to the current work.

367 **Mourad:** Nothing to report.

368 **Thicklin:** Nothing to report.

369 **Cohen:** Nothing to report.

370 **Garcia del Sol:** Nothing to report.

371 **Ruiz-Unger:** Nothing to report.

372 **Shah:** Nothing to report.

373 **Mehta:** Nothing to report.

374 **Cardona:** Nothing to report.

375 **Scott:** Nothing to report.

376 **Ginde:** Reports grants from NIH during the conduct of the study; Grants from NIH, CDC, DoD, AbbVie  
377 (investigator-initiated), and Faron Pharmaceuticals (investigator-initiated) outside the submitted work.

378 **Castro:** Reports institutional grant funding from NIH, ALA, PCORI, AstraZeneca, GSK, Novartis,  
379 Pulmatrix, Sanofi-Aventis, Shionogi; Speaker/Consultant fees from Grant Funding, Genentech, Teva,  
380 Sanofi-Aventis; Consultant fees from Merck, Novartis, Arrowhead, OM Pharma, Allakos; Speaker  
381 honorarium from Amgen, AstraZeneca, GSK, Regeneron; Royalties from Elsevier all outside the  
382 submitted work.



383 **Jayaweera:** Reports grants from NCATS PI-Ralph Sacco during the conduct of the study; Grants from  
384 Gilead, Pfizer, Janssen, and Viiv; Consulting fees from Theratechnologies outside the submitted work.

385 **Sulkowski:** Reports advisory board fees from AbbVie, Gilead, GSK, Atea, Antios, Precision Bio, Viiv,  
386 and Virion; Institutional grants from Janssen outside the submitted work.

387 **Gentile:** Reports personal fees from Duke University for protocol development and oversight during the  
388 conduct of the study; grants from NIH outside the submitted work.

389 **McTigue:** Reports grants from NIH Research Subcontract to the University of Pittsburgh during the  
390 conduct of the study; Research contract to the University of Pittsburgh from Pfizer, and Janssen outside  
391 the submitted work.

392 **Felker:** Reports institutional research grants from NIH during the conduct of the study and from Novartis  
393 outside the submitted work.

394 **Collins:** Reports grant funding from NHLBI and personal fees from Vir Biotechnology during the  
395 conduct of the study.

396 **Dunsmore:** Nothing to report.

397 **Adam:** Reports other from US Government Funding through Operation Warp Speed during the conduct  
398 of the study.

399 **Lindsell:** Reports institutional grants from NCATS during the conduct of the study; Institutional grants  
400 from NIH, CDC, and DoD; Contract with institution for research services from Endpoint Health,  
401 bioMerieux, Entegriion Inc, Abbvie, and Astra Zeneca, Biomeme, and Novartis outside the submitted  
402 work; Dr Lindsell has a patent for risk stratification in sepsis and septic shock issued to Cincinnati  
403 Children's Hospital Medical Center.

404 **Hernandez:** Reports grants from American Regent, Amgen, Boehringer Ingelheim, Merck, Verily,  
405 Somologic, and Pfizer; Personal fees from AstraZeneca, Boston Scientific, Cytokinetics, Bristol Myers  
406 Squibb, and Merck outside the submitted work.

407 **Naggie:** Reports grants from NIH, the sponsor for this study, during the conduct of the study; Institutional  
408 research grants from Gilead Sciences, AbbVie; Consulting fees from Pardes Biosciences; Scientific

409 advisor/Stock options from Vir Biotechnology; Consulting with no financial payment from Silverback  
410 Therapeutics; DSMB fees from Personal Health Insights, Inc; Event adjudication committee fees from  
411 BMS/PRA outside the submitted work.

412

### 413 **Funding/Support**

414 ACTIV-6 is funded by the National Center for Advancing Translational Sciences (NCATS)  
415 (3U24TR001608-06S1). Additional support for this study was provided by the Office of the Assistant  
416 Secretary for Preparedness and Response, Biomedical Advanced Research and Development Authority  
417 (Contract No.75A50122C00037). The Vanderbilt University Medical Center Clinical and Translational  
418 Science Award from NCATS (UL1TR002243) supported the REDCap infrastructure.

419

### 420 **Role of the Sponsor**

421 NCATS participated in the design and conduct of the study; collection, management, analysis, and  
422 interpretation of the data; preparation, review, or approval of the manuscript; and decision to submit the  
423 manuscript for publication.

424

### 425 **Data Sharing Statement**

426 ACTIV-6 is a platform trial using shared placebos. On completion of the platform trial, when there is no  
427 risk of unblinding across study arms, the data will be made publicly available by depositing it in an  
428 approved data repository such as NHLBI's BioData Catalyst.

429

430 **References**

- 431 1. Del Campo JA, García-Valdecasas M, Gil-Gómez A, et al. Simvastatin and metformin inhibit cell  
432 growth in hepatitis C virus infected cells via mTOR increasing PTEN and autophagy. *PLoS One*.  
433 2018;13(1):e0191805. doi:10.1371/journal.pone.0191805
- 434 2. Karam BS, Morris RS, Bramante CT, et al. mTOR inhibition in COVID-19: A commentary and  
435 review of efficacy in RNA viruses. <https://doi.org/10.1002/jmv.26728>. *Journal of Medical*  
436 *Virology*. 2021/04/01 2021;93(4):1843-1846. doi:<https://doi.org/10.1002/jmv.26728>
- 437 3. Tsai WL, Chang TH, Sun WC, et al. Metformin activates type I interferon signaling against HCV  
438 via activation of adenosine monophosphate-activated protein kinase. *Oncotarget*. Nov 3  
439 2017;8(54):91928-91937. doi:10.18632/oncotarget.20248
- 440 4. Soto-Acosta R, Bautista-Carbajal P, Cervantes-Salazar M, Angel-Ambrocio AH, Del Angel RM.  
441 DENV up-regulates the HMG-CoA reductase activity through the impairment of AMPK  
442 phosphorylation: A potential antiviral target. *PLoS Pathog*. Apr 2017;13(4):e1006257.  
443 doi:10.1371/journal.ppat.1006257
- 444 5. Karim M, Lo CW, Einav S. Preparing for the next viral threat with broad-spectrum antivirals. *J*  
445 *Clin Invest*. Jun 1 2023;133(11)doi:10.1172/jci170236
- 446 6. Zhang R, Feng C, Luo D, et al. Metformin Hydrochloride Significantly Inhibits Rotavirus  
447 Infection in Caco2 Cell Line, Intestinal Organoids, and Mice. *Pharmaceuticals (Basel)*. Sep 11  
448 2023;16(9)doi:10.3390/ph16091279
- 449 7. Ibrahim S, Lowe JR, Bramante CT, et al. Metformin and Covid-19: Focused Review of  
450 Mechanisms and Current Literature Suggesting Benefit. *Front Endocrinol (Lausanne)*.  
451 2021;12:587801. doi:10.3389/fendo.2021.587801
- 452 8. Nakashima K, Takeuchi K, Chihara K, Hotta H, Sada K. Inhibition of hepatitis C virus replication  
453 through adenosine monophosphate-activated protein kinase-dependent and -independent  
454 pathways. *Microbiol Immunol*. Nov 2011;55(11):774-82. doi:10.1111/j.1348-0421.2011.00382.x

- 455 9. Shinohara Y, Imajo K, Yoneda M, et al. Unfolded protein response pathways regulate Hepatitis C  
456 virus replication via modulation of autophagy. *Biochem Biophys Res Commun*. Mar 8  
457 2013;432(2):326-32. doi:10.1016/j.bbrc.2013.01.103
- 458 10. Kow CS, Hasan SS. Mortality risk with preadmission metformin use in patients with COVID-19  
459 and diabetes: A meta-analysis. *J Med Virol*. Feb 2021;93(2):695-697. doi:10.1002/jmv.26498
- 460 11. Song ZH, Huang QM, Xu SS, Zhou JB, Zhang C. The Effect of Antihyperglycemic Medications  
461 on COVID-19: A Meta-analysis and Systematic Review from Observational Studies. *Ther Innov  
462 Regul Sci*. Jul 2024;58(4):773-787. doi:10.1007/s43441-024-00633-6
- 463 12. Crouse AB, Grimes T, Li P, Might M, Ovalle F, Shalev A. Metformin Use Is Associated With  
464 Reduced Mortality in a Diverse Population With COVID-19 and Diabetes. *Front Endocrinol  
465 (Lausanne)*. 2020;11:600439. doi:10.3389/fendo.2020.600439
- 466 13. Bramante CT, Huling JD, Tignanelli CJ, et al. Randomized Trial of Metformin, Ivermectin, and  
467 Fluvoxamine for Covid-19. *N Engl J Med*. Aug 18 2022;387(7):599-610.  
468 doi:10.1056/NEJMoa2201662
- 469 14. Ventura-López C, Cervantes-Luevano K, Aguirre-Sánchez JS, et al. Treatment with metformin  
470 glycinate reduces SARS-CoV-2 viral load: An in vitro model and randomized, double-blind,  
471 Phase IIb clinical trial. *Biomed Pharmacother*. Aug 2022;152:113223.  
472 doi:10.1016/j.biopha.2022.113223
- 473 15. Chan LE, Casiraghi E, Laraway B, et al. Metformin is associated with reduced COVID-19  
474 severity in patients with prediabetes. *Diabetes Res Clin Pract*. Dec 2022;194:110157.  
475 doi:10.1016/j.diabres.2022.110157
- 476 16. Qiu S, Hubbard AE, Gutiérrez JP, et al. Estimating the effect of realistic improvements of  
477 metformin adherence on COVID-19 mortality using targeted machine learning. *Glob Epidemiol*.  
478 Jun 2024;7:100142. doi:10.1016/j.gloepi.2024.100142

- 479 17. Hunt CM, Efird JT, Redding TS, et al. Medications Associated with Lower Mortality in a SARS-  
480 CoV-2 Positive Cohort of 26,508 Veterans. *Journal of General Internal Medicine*. 2022/12/01  
481 2022;37(16):4144-4152. doi:10.1007/s11606-022-07701-3
- 482 18. Usman A, Bliden KP, Cho A, et al. Metformin use in patients hospitalized with COVID-19: lower  
483 inflammation, oxidative stress, and thrombotic risk markers and better clinical outcomes. *J*  
484 *Thromb Thrombolysis*. Feb 2022;53(2):363-371. doi:10.1007/s11239-022-02631-7
- 485 19. ACTIV-6: Operationalizing a decentralized, outpatient randomized platform trial to evaluate  
486 efficacy of repurposed medicines for COVID-19. *J Clin Transl Sci*. 2023;7(1):e221.  
487 doi:10.1017/cts.2023.644
- 488 20. Naggie S, Boulware DR, Lindsell CJ, et al. Effect of Ivermectin vs Placebo on Time to Sustained  
489 Recovery in Outpatients With Mild to Moderate COVID-19: A Randomized Clinical Trial. *JAMA*.  
490 2022;328(16):1595-1603. doi:10.1001/jama.2022.18590
- 491 21. Schulz KF, Altman DG, Moher D, Group C. CONSORT 2010 Statement: updated guidelines for  
492 reporting parallel group randomised trials. *Trials*. Mar 24 2010;11:32. doi:10.1186/1745-6215-11-  
493 32
- 494 22. Harris PA, Taylor R, Minor BL, et al. The REDCap consortium: Building an international  
495 community of software platform partners. *J Biomed Inform*. Jul 2019;95:103208.  
496 doi:10.1016/j.jbi.2019.103208
- 497 23. Harris PA, Taylor R, Thielke R, Payne J, Gonzalez N, Conde JG. Research electronic data capture  
498 (REDCap)--a metadata-driven methodology and workflow process for providing translational  
499 research informatics support. *J Biomed Inform*. Apr 2009;42(2):377-81.  
500 doi:10.1016/j.jbi.2008.08.010
- 501 24. Rohde MD, French B, Stewart TG, Harrell FE, Jr. Bayesian transition models for ordinal  
502 longitudinal outcomes. *Stat Med*. Aug 15 2024;43(18):3539-3561. doi:10.1002/sim.10133

- 503 25. *Adjusting for Covariates in Randomized Clinical Trials for Drugs and Biological Products*. 2023.  
504 [https://www.fda.gov/regulatory-information/search-fda-guidance-documents/adjusting-](https://www.fda.gov/regulatory-information/search-fda-guidance-documents/adjusting-covariates-randomized-clinical-trials-drugs-and-biological-products)  
505 [covariates-randomized-clinical-trials-drugs-and-biological-products](https://www.fda.gov/regulatory-information/search-fda-guidance-documents/adjusting-covariates-randomized-clinical-trials-drugs-and-biological-products)
- 506 26. Holmberg MJ, Andersen LW. Adjustment for Baseline Characteristics in Randomized Clinical  
507 Trials. *JAMA*. 2022;328(21):2155-2156. doi:10.1001/jama.2022.21506
- 508 27. Expression of concern - Effect of early treatment with metformin on risk of emergency care and  
509 hospitalization among patients with COVID-19: the TOGETHER randomized platform clinical  
510 trial. *The Lancet Regional Health – Americas*. 2024;31doi:10.1016/j.lana.2024.100703
- 511 28. Lee TC, Boulware DR. Is there room for metformin at COVID-19's dinner table? Updated  
512 Analysis of Clinical Trials. *Clin Infect Dis*. May 17 2024;doi:10.1093/cid/ciae284
- 513 29. Correction to: Repurposing Revisited: Exploring the Role of Metformin for Treatment of  
514 Coronavirus Disease 2019. *Clinical Infectious Diseases*. 2024;79(1):285-285.  
515 doi:10.1093/cid/ciae257
- 516 30. Hammond J, Leister-Tebbe H, Gardner A, et al. Oral Nirmatrelvir for High-Risk, Nonhospitalized  
517 Adults with Covid-19. *New England Journal of Medicine*. 2022;386(15):1397-1408.  
518 doi:10.1056/NEJMoa2118542
- 519 31. Jayk Bernal A, Gomes da Silva MM, Musungaie DB, et al. Molnupiravir for Oral Treatment of  
520 Covid-19 in Nonhospitalized Patients. *N Engl J Med*. Feb 10 2022;386(6):509-520.  
521 doi:10.1056/NEJMoa2116044
- 522 32. Ma KC, Castro J, Lambrou AS, et al. Genomic Surveillance for SARS-CoV-2 Variants:  
523 Circulation of Omicron XBB and JN.1 Lineages - United States, May 2023-September 2024.  
524 *MMWR Morb Mortal Wkly Rep*. Oct 24 2024;73(42):938-945. doi:10.15585/mmwr.mm7342a1
- 525 33. Lewnard JA, Mahale P, Malden D, et al. Immune escape and attenuated severity associated with  
526 the SARS-CoV-2 BA.2.86/JN.1 lineage. *Nat Commun*. Oct 3 2024;15(1):8550.  
527 doi:10.1038/s41467-024-52668-w

- 528 34. Levy ME, Chilunda V, Davis RE, et al. Reduced Likelihood of Hospitalization with the JN.1 or  
529 HV.1 SARS-CoV-2 Variants Compared to the EG.5 Variant. *J Infect Dis*. Jul 19  
530 2024;doi:10.1093/infdis/jiae364
- 531 35. Pocock SJ, Stone GW. The Primary Outcome Fails — What Next? *New England Journal of*  
532 *Medicine*. 2016;375(9):861-870. doi:10.1056/NEJMra1510064
- 533 36. Qu P, Evans JP, Faraone JN, et al. Enhanced neutralization resistance of SARS-CoV-2 Omicron  
534 subvariants BQ.1, BQ.1.1, BA.4.6, BF.7, and BA.2.75.2. *Cell Host Microbe*. Jan 11 2023;31(1):9-  
535 17 e3. doi:10.1016/j.chom.2022.11.012
- 536 37. Wang Q, Mellis IA, Ho J, et al. Recurrent SARS-CoV-2 spike mutations confer growth  
537 advantages to select JN.1 sublineages. *Emerg Microbes Infect*. Dec 2024;13(1):2402880.  
538 doi:10.1080/22221751.2024.2402880
- 539 38. Cao B, Wang Y, Lu H, et al. Oral Simnoretelvir for Adult Patients with Mild-to-Moderate Covid-  
540 19. *New England Journal of Medicine*. 2024/01/17 2024;390(3):230-241.  
541 doi:10.1056/NEJMoa2301425
- 542 39. Gordon DE, Jang GM, Bouhaddou M, et al. A SARS-CoV-2 protein interaction map reveals  
543 targets for drug repurposing. *Nature*. 2020/07/01 2020;583(7816):459-468. doi:10.1038/s41586-  
544 020-2286-9
- 545 40. Parthasarathy H, Tandel D, Siddiqui AH, Harshan KH. Metformin suppresses SARS-CoV-2 in  
546 cell culture. *Virus Res*. Nov 20 2022;323:199010. doi:10.1016/j.virusres.2022.199010
- 547 41. Bramante CT, Beckman KB, Mehta T, et al. Favorable Antiviral Effect of Metformin on Severe  
548 Acute Respiratory Syndrome Coronavirus 2 Viral Load in a Randomized, Placebo-Controlled  
549 Clinical Trial of Coronavirus Disease 2019. *Clin Infect Dis*. May 1 2024;doi:10.1093/cid/ciae159
- 550 42. Schaller MA, Sharma Y, Dupee Z, et al. Ex vivo SARS-CoV-2 infection of human lung reveals  
551 heterogeneous host defense and therapeutic responses. *JCI Insight*. 09/22/  
552 2021;6(18)doi:10.1172/jci.insight.148003

- 553 43. Xian H, Liu Y, Rundberg Nilsson A, et al. Metformin inhibition of mitochondrial ATP and DNA  
554 synthesis abrogates NLRP3 inflammasome activation and pulmonary inflammation. *Immunity*.  
555 Jul 13 2021;54(7):1463-1477.e11. doi:10.1016/j.immuni.2021.05.004
- 556 44. Bramante CT, Buse JB, Liebovitz DM, et al. Outpatient treatment of COVID-19 and incidence of  
557 post-COVID-19 condition over 10 months (COVID-OUT): a multicentre, randomised, quadruple-  
558 blind, parallel-group, phase 3 trial. *Lancet Infect Dis*. Jun 8 2023;doi:10.1016/S1473-  
559 3099(23)00299-2
- 560 45. Bramante CT. Metformin reduces the risk of Long COVID or Death over 6 months in an  
561 Emulated Target Trial of Primarily Omicron-infected Adults without Diabetes or Prediabetes: a  
562 New-User, Active-Comparator Analysis Using the National COVID  
563 Cohort Collaborative (N3C) Electronic Health Record Database. 2024:  
564  
565



566 **Figure Legends**

567 **Figure 1.** Participant flow in a trial of metformin for mild to moderate COVID-19

568 **Figure 2.** Primary outcome of time to sustained recovery

569 **Figure 3.** (A) Time to sustained recovery; (B) hospitalization, urgent or emergency care visits, or death;

570 and (C) mean time unwell

571

572 Table 1. Baseline participant characteristics

| <b>Variable</b>                                                        | <b>Metformin<br/>(n=1443)</b> | <b>Placebo<br/>(n=1548)</b> |
|------------------------------------------------------------------------|-------------------------------|-----------------------------|
| Age, median (IQR), yrs                                                 | 47.0 (38.0-57.5)              | 48.0 (37.0-58.0)            |
| Age < 50 yrs, no. (%)                                                  | 798 (55.3)                    | 846 (54.7)                  |
| Sex, no. (%)                                                           |                               |                             |
| Female                                                                 | 918 (63.62)                   | 977 (63.11)                 |
| Male                                                                   | 522 (36.17)                   | 566 (36.56)                 |
| Undifferentiated                                                       | 1 (0.07)                      | 1 (0.06)                    |
| Unknown                                                                | 1 (0.07)                      | 2 (0.13)                    |
| Prefer not to answer                                                   | 1 (0.07)                      | 2 (0.13)                    |
| Race <sup>a</sup> , not mutually exclusive, no. (%)                    |                               |                             |
| American Indian or Alaska Native                                       | 18 (1.25)                     | 7 (0.45)                    |
| Asian                                                                  | 37 (2.56)                     | 40 (2.58)                   |
| Black, African American, or African<br>Middle Eastern or North African | 164 (11.37)                   | 186 (12.02)                 |
| Native Hawaiian or Other Pacific Islander                              | 35 (2.43)                     | 24 (1.55)                   |
| White                                                                  | 4 (0.28)                      | 4 (0.26)                    |
| None of the above                                                      | 1162 (80.53)                  | 1233 (79.65)                |
| Prefer not to answer                                                   | 31 (2.15)                     | 37 (2.39)                   |
| Ethnicity, no. (%)                                                     | 25 (1.73)                     | 28 (1.81)                   |
| Hispanic or Latino                                                     | 680 (47.12)                   | 712 (45.99)                 |
| Not Hispanic or Latino                                                 | 763 (52.88)                   | 836 (54.01)                 |
| Region <sup>b</sup> , no. (%)                                          |                               |                             |
| Midwest                                                                | 295 (20.44)                   | 308 (19.90)                 |
| Northeast                                                              | 119 (8.25)                    | 135 (8.72)                  |
| South                                                                  | 890 (61.68)                   | 942 (60.85)                 |
| West                                                                   | 139 (9.63)                    | 163 (10.53)                 |
| Recruited via call center <sup>c</sup> , no. (%)                       | 41 (2.84)                     | 42 (2.71)                   |
| BMI, median (IQR), kg/m <sup>2</sup>                                   | 28.6 (25.4-32.6)              | 28.3 (25.1-31.9)            |
| BMI >30 kg/m <sup>2</sup> , no./total (%)                              | 579/1443 (40.1)               | 566/1547 (36.6)             |
| Weight, median (IQR), kg                                               | 81.6 (70.8-94.0)              | 79.8 (70.3-91.2)            |
| Medical history <sup>d</sup> , no./total (%)                           |                               |                             |
| High blood pressure                                                    | 282/1386 (20.35)              | 316/1481 (21.34)            |
| Diabetes                                                               | 31/1386 (2.24)                | 27/1481 (1.82)              |
| Smoker, past year                                                      | 197/1386 (14.21)              | 229/1481 (15.46)            |
| Asthma                                                                 | 142/1386 (10.25)              | 135/1481 (9.12)             |
| Heart disease                                                          | 41/1386 (2.96)                | 48/1481 (3.24)              |
| Malignant cancer                                                       | 29/1384 (2.10)                | 31/1476 (2.10)              |
| COPD                                                                   | 30/1386 (2.16)                | 28/1481 (1.89)              |
| Chronic kidney disease                                                 | 1/1386 (0.07)                 | 6/1481 (0.41)               |
| SARS-CoV-2 vaccine status, no. (%)                                     |                               |                             |
| Not vaccinated                                                         | 463 (32.09)                   | 480 (31.01)                 |
| Vaccinated, 1 dose                                                     | 2 (0.14)                      | 2 (0.13)                    |
| Vaccinated, 2+ doses                                                   | 978 (67.78)                   | 1066 (68.86)                |
| Days between symptom onset and receipt of drug, median (IQR)           | 5 (4-7) <sup>e</sup>          | 5 (4-7) <sup>f</sup>        |
| Days between symptom onset and enrollment, median (IQR)                | 3 (2-5) <sup>e</sup>          | 3 (2-5) <sup>f</sup>        |

| Symptom burden on study day 1 <sup>g</sup> , no./No. (%) |                 |                 |
|----------------------------------------------------------|-----------------|-----------------|
| None                                                     | 68/1322 (5.1)   | 66/1388 (4.8)   |
| Mild                                                     | 610/1322 (46.1) | 660/1388 (47.6) |
| Moderate                                                 | 610/1322 (46.1) | 617/1388 (44.5) |
| Severe                                                   | 34/1322 (2.6)   | 45/1388 (3.2)   |
| COVID-19 medications, no. (%)                            |                 |                 |
| Remdesivir                                               | 1 (0.07)        | 0 (0.00)        |
| Nirmatrelvir + ritonavir                                 | 204 (14.14)     | 229 (14.79)     |
| Monoclonal antibodies                                    | 31 (2.15)       | 43 (2.78)       |
| Molnupiravir                                             | 10 (0.69)       | 13 (0.84)       |

573 Abbreviations: BMI, body mass index (calculated as weight in kilograms divided by height in meters squared); COPD, chronic  
574 obstructive pulmonary disease.  
575 <sup>a</sup>Participants were presented with each of these options and may have selected any combination of the race descriptors, including  
576 “none of the above” and “prefer not to answer.” Consequently, the sums of counts over all categories do not match the column  
577 totals.  
578 <sup>b</sup>The following state groups define each region. Northeast includes Connecticut, Maine, Massachusetts, New Hampshire, Rhode  
579 Island, Vermont, New Jersey, New York, and Pennsylvania; Midwest includes Indiana, Illinois, Michigan, Ohio, Wisconsin, Iowa,  
580 Kansas, Minnesota, Missouri, Nebraska, North Dakota, and South Dakota; South includes Delaware, District of Columbia,  
581 Florida, Georgia, Maryland, North Carolina, South Carolina, Virginia, West Virginia, Alabama, Kentucky, Mississippi, Tennessee,  
582 Arkansas, Louisiana, Oklahoma, and Texas; West includes Arizona, Colorado, Idaho, New Mexico, Montana, Utah, Nevada,  
583 Wyoming, Alaska, California, Hawaii, Oregon, and Washington.  
584 <sup>c</sup>Patients may have alternatively been recruited at local clinical sites.  
585 <sup>d</sup>Medical history was provided by participants responding to the following prompts: “Has a doctor told you that you have any of  
586 the following?” “Have you ever experienced any of the following? (select all that apply),” and “Have you ever smoked tobacco  
587 products?”  
588 <sup>e</sup>Among 1411 participants;  
589 <sup>f</sup>Among 1511 participants  
590 <sup>i</sup>Each day, participants were asked, “Please choose the response that best describes the severity of your COVID-19 symptoms  
591 today.”

| Outcome                                                                                         | Metformin<br>(n=1443)<br>No. (%) | Placebo<br>(n=1548)<br>No. (%) | Adjusted Estimate <sup>a</sup><br>HR (95% CrI) | Posterior<br>P(efficacy) |
|-------------------------------------------------------------------------------------------------|----------------------------------|--------------------------------|------------------------------------------------|--------------------------|
| <b>Primary end point</b>                                                                        |                                  |                                |                                                |                          |
| Time to sustained recovery <sup>b</sup>                                                         |                                  |                                |                                                |                          |
| Skeptical prior (primary analysis)                                                              |                                  |                                | 0.96 (0.89 to 1.03)                            | 0.11                     |
| Noninformative prior (sensitivity analysis)                                                     |                                  |                                | 0.95 (0.88 to 1.03)                            | 0.10                     |
| No prior (sensitivity analysis)                                                                 |                                  |                                | 0.95 (0.88 to 1.03) <sup>c</sup>               | NA                       |
| Adjusted for baseline vs day 1 symptoms                                                         |                                  |                                | 0.98 (0.91 to 1.05)                            |                          |
| <b>Secondary end points<sup>d</sup></b>                                                         |                                  |                                |                                                |                          |
| Hospitalization, clinic visit, emergency department visit, or death through day 28 <sup>e</sup> | 58 (4.02)                        | 53 (3.42)                      | 1.24 (0.81 to 1.75) <sup>c</sup>               | 0.135                    |
| Mortality at day 28                                                                             | 0                                | 0                              | NA                                             | NA                       |
| Hospitalization or death through day 28                                                         | 4 (0.28)                         | 3 (0.19)                       | 1.43 (0.32 to 6.38) <sup>c</sup>               | NA                       |
| <b>Secondary end points</b>                                                                     |                                  |                                |                                                |                          |
|                                                                                                 | <b>Mean (95% CrI)</b>            |                                | <b>OR (95% CrI)</b>                            |                          |
| Clinical progression ordinal outcome scale <sup>f</sup>                                         |                                  |                                |                                                |                          |
| Day 7 (n=2884)                                                                                  |                                  |                                | 1.00 (0.70 to 1.35)                            | 0.544                    |
| Day 14 (n=2812)                                                                                 |                                  |                                | 0.96 (0.56 to 1.42)                            | 0.613                    |
| Day 28 (n=2733)                                                                                 |                                  |                                | 1.08 (0.78 to 1.40)                            | 0.347                    |
| Time unwell, days (95% CrI) <sup>g</sup>                                                        | 11.55 (11.41, 11.67)             | 11.51 (11.38, 11.65)           | NA <sup>h</sup>                                | 0.400                    |

593 Abbreviations: CrI, credible interval; ED, emergency department; HR, hazard ratio; NA, not applicable; OR, odds ratio, for which greater than 1.0 is the direction of benefit for  
594 metformin.

595 <sup>a</sup> Unless otherwise noted, a highest-density credible interval is shown. Adjustment variables for time to sustained recovery, mortality, composite clinical end points, and clinical  
596 progression in addition to randomization assignment were age (as restricted cubic splines), sex, duration of symptoms prior to receipt of study drug, calendar time (as restricted  
597 cubic splines), vaccination status, geographic region (Northeast, Midwest, South, and West), call center indicator, and day 1 symptom severity.

598 <sup>b</sup> Time from receipt of study drug to achieving the third of 3 days of recovery. An HR greater than 1.0 is favorable for faster recovery for metformin compared with placebo.

599 <sup>c</sup> Low event rate precluded covariate adjustment. Maximum partial likelihood estimate (no prior) with a 95% CI.

600 <sup>d</sup> For secondary outcomes, an HR or OR less than 1 favors metformin.

601 <sup>e</sup> A priori, death was a component of the composite outcome; however, no deaths were observed.

602 <sup>f</sup> The COVID-19 clinical outcome scale ranges from 0 (no clinical or virologic evidence of infection) to 8 (death), with higher scores indicating more severe illness. See the  
603 eMethods in Supplement for a full description.

604 <sup>g</sup> Adjustment variables for mean time unwell in addition to randomization assignment included age and calendar time.  
605 <sup>h</sup> Difference in means was 0.03 (95% CI, -0.21 to 0.28), favoring placebo.

606 **Figure 1.** Participant flow in a trial of metformin for mild to moderate COVID-19

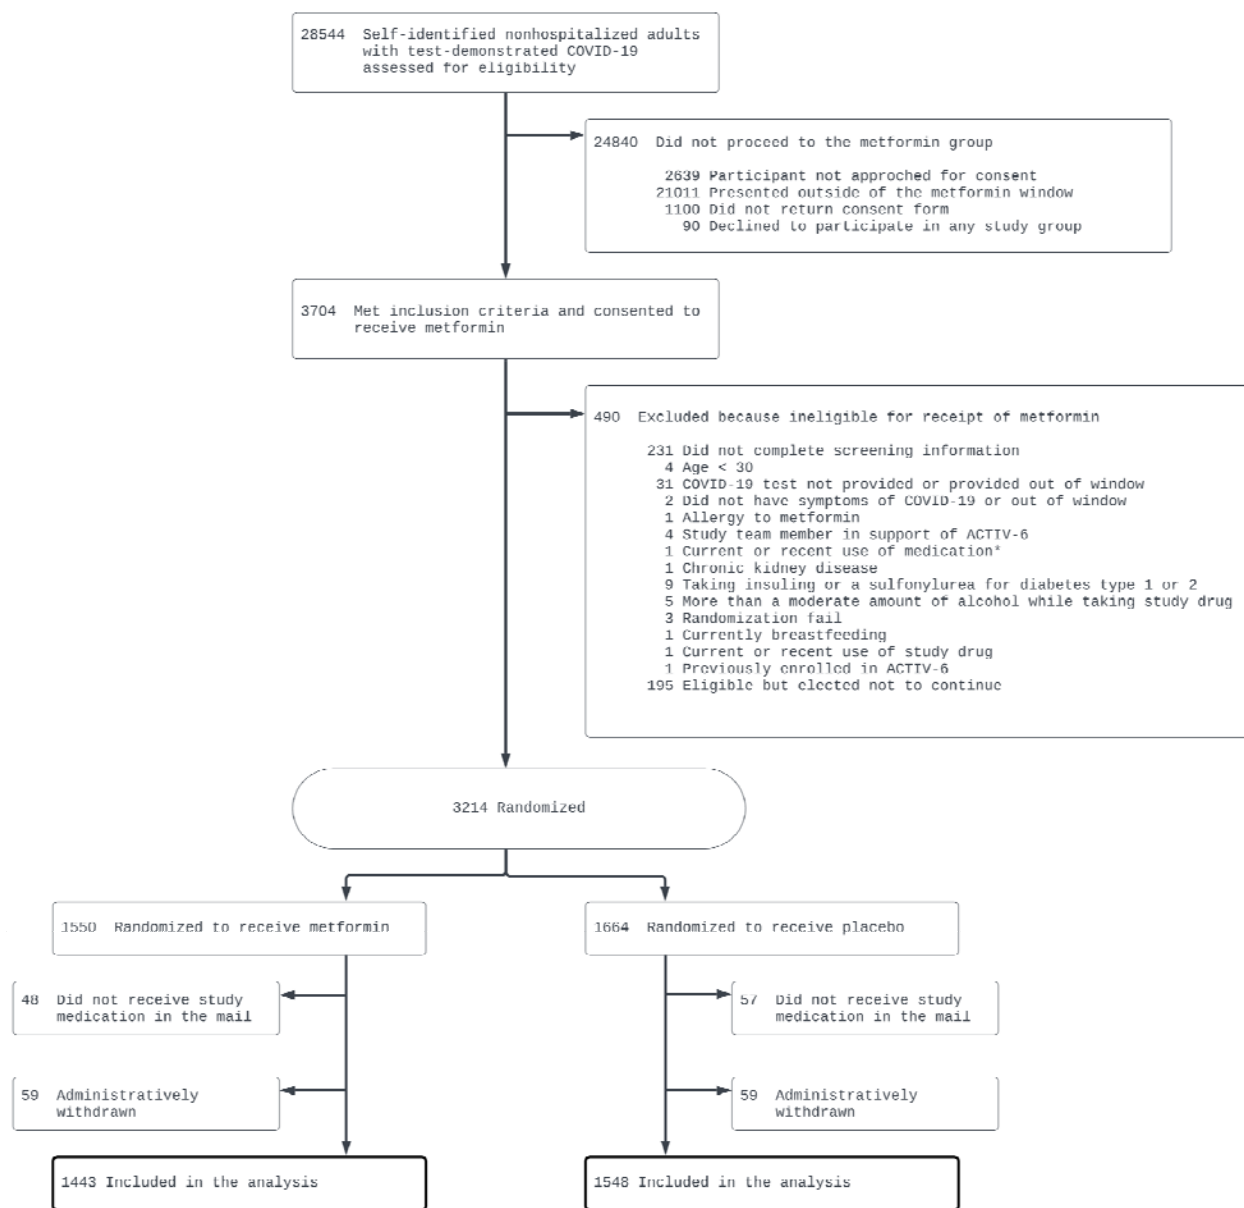

607

608

609

610 **Figure 2.** Primary outcome of time to sustained recovery

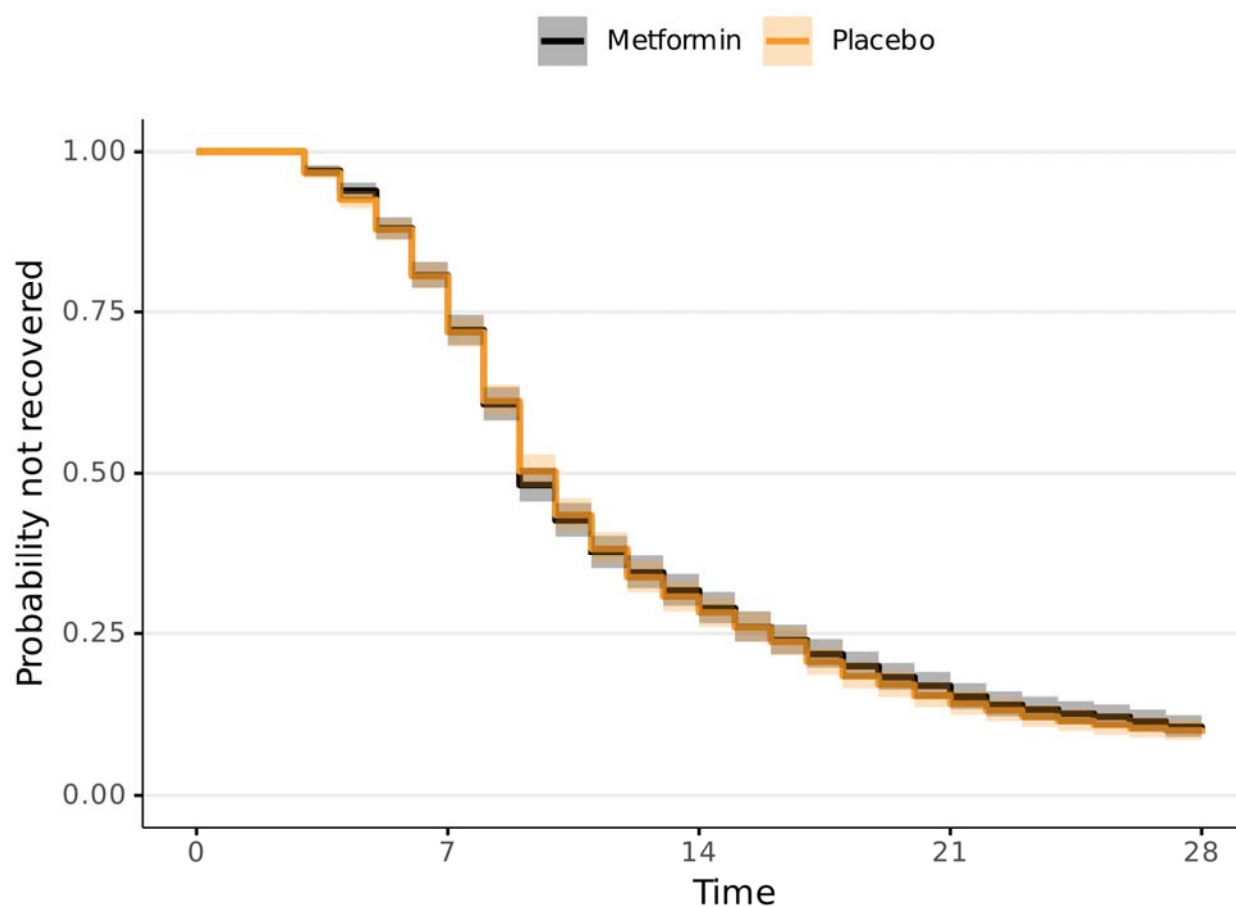

No. at risk

|           |      |      |     |     |     |
|-----------|------|------|-----|-----|-----|
| Metformin | 1416 | 1111 | 415 | 213 | 126 |
| Placebo   | 1504 | 1185 | 438 | 209 | 129 |

611  
 612 Sustained recovery was defined as the third of 3 consecutive days without symptoms. Seventy-one participants were censored for  
 613 complete nonresponse and an additional 168 after partial response, 239/2,991, 8%; all others were followed up until recovery,  
 614 death, or the end of short-term 28-day follow-up. Median time to sustained recovery was 9 days (95% CI, 9-10 days) in the  
 615 metformin group and 10 days (95% CI, 9-10 days) in the placebo group. Shading denotes the pointwise 95% confidence  
 616 intervals.

617

618 **Figure 3A.** Posterior distribution of treatment effect hazard ratio for time to sustained recovery

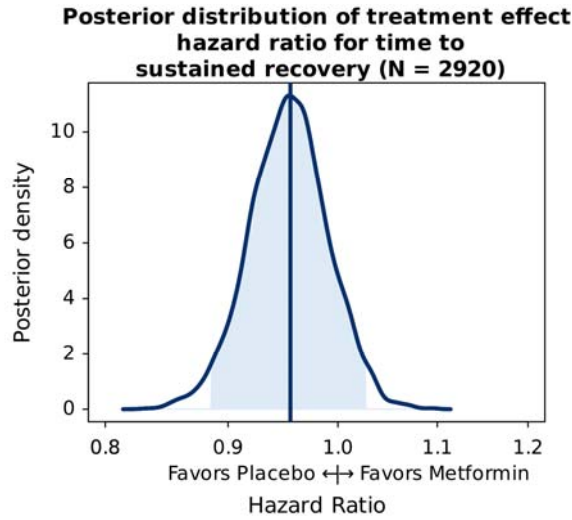

619

620 Posterior density is the relative likelihood of posterior probability distribution. Outcomes with higher posterior density are more  
621 likely than outcomes with lower posterior density. Blue density lines represent kernel density estimates constructed from  
622 posterior draws; vertical lines, estimated means of the posterior distribution; shading, the 95% credible interval. Posterior density  
623 plots of all the covariates in the primary outcome model are shown in eFigure 8 in Supplement.

624



625 **Figure 3B.** Posterior distribution of treatment effect hazard ratio for time to first hospitalization, urgent or  
626 emergency care visit, or death

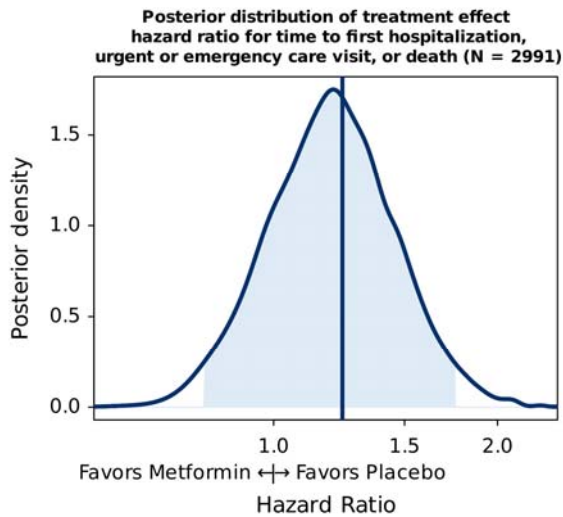

627  
628 Posterior density is the relative likelihood of posterior probability distribution. Outcomes with higher posterior density are more  
629 likely than outcomes with lower posterior density. Blue density lines represent kernel density estimates constructed from  
630 posterior draws; vertical lines, estimated means of the posterior distribution; shading, the 95% credible interval. Posterior density  
631 plots of all the covariates in the primary outcome model are shown in eFigure 8 in Supplement.

632

633

634 **Figure 3C.** Posterior distribution of difference in mean time unwell

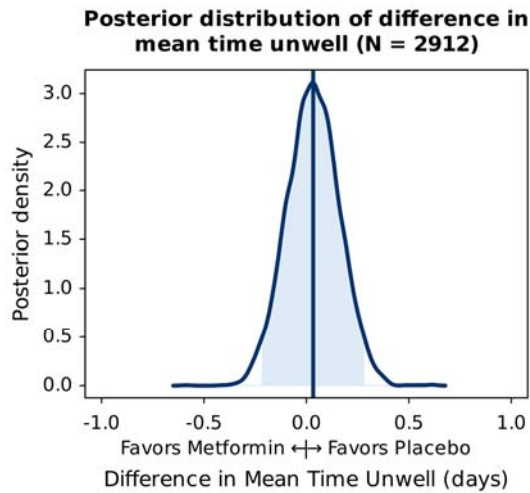

635

636 Posterior density is the relative likelihood of posterior probability distribution. Outcomes with higher posterior density are more  
637 likely than outcomes with lower posterior density. Blue density lines represent kernel density estimates constructed from  
638 posterior draws; vertical lines, estimated means of the posterior distribution; shading, the 95% credible interval. Posterior density  
639 plots of all the covariates in the primary outcome model are shown in eFigure 8 in Supplement.

640
